# Supplementary material
Source: Research Square preprint supplement (doi:10.21203/rs.3.rs-8789362/v1)
Supplement: Supplementary file 1 [file a4c59c73a2aabe9910170e1b.xlsx]

## Sheet: Study Information
Column1	Study design	RoB	Authors	Year	Language of publication	Language of study	Participant recruitment	Age	Sex	Ethnicitiy	N	Provision/Intervention	Duration	Outcomes	Key findings	Note
1	Quasi-experimental, pre-post test	High	Majzub & Buang	2010	English	Malay	Not specified	Not specified	Not specified	Not specified	100	- Experimental group received instruction using the Reading Intervention Module (MIM); control group followed traditional teacher-selected methods without MIM - MIM designed to improve reading achievement through structured, targeted literacy activities - Effectiveness assessed via pre- and post-test comparison using t-test analysis	3 months	Reading achievement in Bahasa Malaysia	- Significant improvement in experimental group’s performance compared to control group (adapted Diagnostic KIA2M instrument) - Intervention showed positive effects on targeted learning outcomes (p < .05)
2	Cross-sectional	Low	Ong et al.	2010	English	English	Random sampling	Primary 2	465 (50.6) male	Malay; Chinese; Indian; Others; Migrant	919	Preschool attendance	Not applicable	Cognitive ability; Raven's Standard Progressive Matrices	95.4% of children who were in the normal progress attended preschool; 89.2% of children in the poor category attended preschool
3	Quasi-experimental, pre-post test	High	Omar & Mohd Rias	2013	English	English	Not specified	5 years	25 girls (62.5%); 15 boys (37.5%)	Not specified	40	Animated pedagogical agent	2 days	Reading ability for English words and sentences	- Significant improvement in reading ability from pre- to post-test (p < .05) - Males outperformed females at pre-test; females outperformed males at post-test - Intervention used play-based English instruction guided by the ADDIE model
4	Quasi-experimental, pre-post test	Medium	Bacotang	2013	Malay	Not specified	Not specified	4 years	10 girls (50%); 10 boys (50%)	Not specified	20	- Modul Literasi Awal (MULA) - adapted from Get Ready to Read (GRTR) program	5 weeks	Early literacy; Ujian Pengesanan Kemahiran Literasi Awal	- Significant differences in post-test early literacy scores between treatment and control groups - MULA improved early literacy of treatment group
5	Quasi-experimental, pre-post test	Medium	Mohamed Isa et al.	2013	English	Not specified	Purposive sampling	5 to 6 years	Not specified in final sample	Not specified	50	Reader's Theater (reading aloud, choral reading, reading robin, paired reading)	5 weeks	Translated fluency checklist from the National Assessment of Educational Progress	- Reader's Theather significantly improves fluency - Reader's Theater did not significantly imrove comprehension
6	Cross-sectional - direct assessment	Low	Hutagalung et al.	2014	English	English	Purposive sampling	5 to 6 years	49 girls (40.5%); 72 boys (59.5%)	Not specified	121	Type of preschool (Public vs. private)	Not applicable	Cognitive ability (McCarthy Scales of Children’s Abilities (MSCA))	No significant difference in cognitive ability between children in public and private preschools (p > .05)	Full paper was requested from first author. The paper provided by first author has different title and authors than requested paper. Information here is from the provided paper.
7	Quasi-experimental with non-equivalent control group pre test/post-test research design.	Medium	Chin & Zakaria	2015	English	Malay	Not specified	5 to 6 years	Not specified	Not specified	47	Games-based learning (GBL)	Not specified	Learning behaviour - Learning Behavior Scale (LBS); Prosocial behavior (video recordings and observations using observation table adapted from Weir & Duveen (1981)	-Significant difference in learning behavior between treatment and control -Treatment group showed more prosocial behaviour, but frequency decreases over time
8	Quasi-experimental, pre-post test	High	Ng et al.	2016	English	English	Purposive sampling (implied)	Not specified	Not specified	Not specified	6	- Children with learning difficulties (n = 6) were divided into control and experimental groups - Experimental group received syllable instruction via a tablet-based, persuasive-designed multimedia courseware; control group received traditional instruction from a special education teacher - Courseware (newly developed for the study) featured interactive syllable modules with visual and pronunciat…	20 minutes	Syllable recognition - paper-based pre- and post-test questionnaires (10 Malay syllable items with image-matching tasks)	Experimental group showed a significant increase in mean post-test scores (+3.33), while the control group showed no improvement (mean score remained 6.0)
9	Multi-site, quasi-experimental	Low	Ompok	2016	Malay	Not specified	Not specified	4 to 5 years	Not specidfied	Not specified	1108	Not applicable; Comparative study between KPM preschools and KEMAS preschools	Not applicable	Early mathematic achievement	- Significant differences between KPM and KEMAS preschools - Differences could be attributed to the attention that teachers gave to students
10	Randomized controlled trial (RCT)	Low	Akmal Rohaizad et al.	2017	English	English	Purposive sampling	3 to 6 years	Not specified	Not specified	100	- Preschool-based emotional intelligence (EI) module targeting four EI components: identifying, understanding, controlling, and using emotions - Each component addressed through structured activities facilitated by teachers to enhance specific EI skills in children - Intervention implemented by preschool teachers as part of regular teaching activities	Six weeks	Emotional intelligence: identifying, understanding, controlling, and using emotions (Sullivan Emotional Intelligence Scale for Children [EISC])	Significant improvement in emotional intelligence observed in the experimental group (paired t-test); no significant change in control group
11	Quasi-experimental, pre-post test	Medium	Chew & Eau	2017	English	English	Not reported	4 to 5 years	24 girls (57.1%); 18 boys (42.9%)	Chinese; Malay	42	Literature-based intervention using Wallas’ Stage Model to teach creative thinking through ten structured lesson plans Focused on four aspects of creative teaching: person (teacher and child), press (supportive environment), product (creative outputs), and process (children’s creative thinking) Lessons incorporated picture e-books selected or designed to enhance creativity during storytelling ses…	4 weeks	Creative thinking abilities Divergent thinking and idea generation (Torrance Test of Creative Thinking)	- Significant gains in originality, elaboration, and fluency components of creativity (pre–post comparison; moderate effect size = .61) - Chinese female children outperformed Malay male children in overall creativity scores
12	Quasi-experimental, pre-post test	Medium	Safiee et al.	2018	English	English	Purposive sampling	7 years	12 girls (44.4%); 15 boys (55.6%)	Not specified	27	- PIL-based science intervention on magnets, structured around four instructional phases - Included multimedia stimuli (images, video) to prompt inquiry and activate prior knowledge about trains and magnetism - Students explored magnetic connectivity in trains, then sketched and constructed model train carriages (engineering in action) - Emphasized hands-on design and iterative thinking through g…	Three weeks	Students’ interest in learning Science	- Project-based Inquiry Learning (PIL) significantly improved students’ attitudes towards science (p < .001) - Post-intervention scores showed a marked increase in positive science attitudes compared to pre-intervention levels
13	Quasi-experimental, pre-post test, mixed methods	High	Mahmud et al.	2019	English	Not specified	Convenience sampling	5- years; 6 years	9 girls (60%); 6 boys (40%)	Not specified	15	AR mobile-based application with no further specifications	Not specified	Early literacy skills: reading and writing of basic words and alphabets (custom pre- and post-test) Learning engagement and satisfaction (learning satisfaction questionnaire)
14	Quasi-experimental, mixed-method	Medium	Siew & Md Nor	2019	English	Not specified	Not specified	6 years	Not specified	Not specified	37	Self-regulated learning (SRL) intervention	4 months	Early writing performance; Self-regulated Strategies for Ealy Writing-Observation Form (SRSEWOF), Early Writing Performance Scale (EWPS)	- Mechanical writing skills and idea elaboration and expression of experiemental group improved post-intervention - Experimental group showed increased use of SRL strategies post-intervention - SRL strategies (planning and goal setting, self-monitoring and controlling) significantly and positively predicts early writing performance
15	Quasi-experimental, pre-post test	Medium	Yeo & Ng	2019	English	Malay	Cluster purposive sampling	Not specified	Not specified	Not specified	64	Early literacy intervention (ELI) on Malay language	14 weeks	Phonological awareness; Malay Early Literacy Skills Test Battery (MELSTB) - 4 literacy skills test: Malay Early Literacy Phonological Awareness Test (MELPAT); Malay Early Literacy Decoding Test (MELDT); Malay Early Literacy Spelling Test (MELST); Malay Early Literacy Reading Comprehension Test (MELRCT)	- Significant differences in post-test phonological awareness between ELI and control groups - Significant differences in post-test literacy decoding between ELI and control groups - Significant differences in post-test spelling between ELI and control groups - Significant differences in post-test reading comprehension between ELI and control groups
16	Quasi experimental method	Low	Ompok	2019	Malay	Not specified	Not specified	Not specified	Not specified	Not specified	1107	Teaching methods: games, number books, worksheet	Not specified	Early mathematical comprehension and analysis; Test of Mathematics Ability (Ginsburg & Baroody, 2003)	- Teaching methods only had significant effects on early mathematical comprehension and analysis - Games had the greatest effect, followed by worksheets and number books
17	Quasi-experimental, random group assignment	Medium	Kim & Md Nor	2019	English	Not specified	Not specified	5 to 6 years	Not specified	Not specified	75	Self-regulated learning (SRL) - 10 units tied to early writing process	4 months	Self-Regualtion Strategies for Early Writing-Observation Form (SRSEWOF) and Self-Efficacy Scale of Early Writing (SESEW); Early Writing Perfornance Scale (EWPS) - developed based on 3 aspects: content, mechanical writing skills, overall writing quality	- Self-regulated learning (SRL) significantly improved content, mechanics, and overall quality of early writing - Self-monitoring and control predicted early writing self-efficacy - Planning and goal-setting predicted early writing performance
18	Survey/Cross-sectional	Low	Felani Shaari et al.	2020	English	Not specified	Prospective cohort study; purposive sampling	Not specified (only preschools with 6 year olds were selected)	Not specified	Not specified	336	Classroom environment and spatial design	Not specified	Cognitive school readiness skills; self-regulation	- Public preschools showed mixed PPE design quality: excellent circulation and indoor environment; poor spatial design - Children in MOE preschools demonstrated moderate school readiness - Overall PPE design quality positively associated with children’s cognitive self-regulation (r = .57, p = .001)
19	Survey/Cross-sectional	Low	Felani Shaari et al.	2020	English	Not specified	Prospective cohort study; purposive sampling	6 years	Not specified	Not specified	378	Classroom environment and spatial design	Not specified, monthly follow-ups	Cognitive school readiness skills	Fair spatial desgn; good image,safety and security, and site location; modified open-plan spaces is strongly correlated with cognitive SR
20	Cross-sectional	Low	Hairol et al.	2021	English	English	In order to obtain a sample that represented the population, similar percentages of children were sampled from both types of preschools.	Mean age: 5.95±0.47 years; Range: 5.08–6.83 years	204 girls (47.0%); 226 boys (52.0%) Gender not reported for 5 children (1.1%)	Malay 85.1%; Chinese 6.0%; Indian 2.1%; Orang Asli (indigenous people) 4.0%; Others 2.8%	435	Preschool type (KEMAS vs private)	Not applicable	Visual-motor integration performance (Beery-Bucktenicka Developmental Test of Visual-Motor Integration)	- Higher proportion of children in public (KEMAS) preschools showed reduced visual-motor integration (VMI) performance compared to those in private preschools - Differences may reflect varying curricular emphases: socio-emotional focus in public vs. cognitive focus in private settings
21	Quasi-experimental, pre-post test	Medium	Abu-Yazid et al.	2021	English	Not specified	Not specified	6 years	20 girls (69.0%); 9 boys (31.0%)	Not specified	29	- MyNEPs (Malaysian Nature Education in Preschool Program) focused on five nature domains: climate, flora, fauna, insects, and microbes - Delivered through outdoor, hands-on activities designed to engage children with the natural environment - Activities supported by structured worksheets to reinforce learning and observation	Not specified (post-test was collected within a month post intervention)	Nature-related knowledge	MyNEPs significantly improve students' knowledge about nature
22	Quasi-experimental, pre-post test	Medium	Ompok et al.	2021	English	Not specified	Not specified	5 to 6 years	Not specified	Not specified	100	Early Mathematics learning module - administered in 65 separate activities in 3 months (5 - 10 minutes per activity) - one mentor/facilitator per group of 5 preschoolers - 55 teacher trainees as mentors and observers - module not specified	3 months	Mathematic performance; Measurement tool: Test of Mathematics Ability (Ginsburd & Barrody, 2003)	Significant improvement in mathematics performance post-intervention
23	Non-equivalent two-group pretest-posttest quasi-experimental design	Medium	Tee	2022	English	Not specified	Purposive sampling	6 years	Not specified	Not specified	56	Creative play (30-45 mins per activity)	3 weeks	Creativity (Fluency, originality, imagination); Torrance's Thinking Creatively in Action and Movement (TCAM)	- Significant and moderate differences in post-test creativity scores between experimental and control group, atter controlling for pre-test - No significant effect of intervention on fluency - Significant and moderate effect of intervention on originality - Significant and large effect of intervention on imagination
24	Teacher-reported survey - Cross-sectional	Low	Abd Raim et al.	2023	English	English	Multistage random sampling	70.19 in months; SD = 7.94	267 girls (47.9%); 290 boys (52.1%)	Primarily Malay/Malay/Chinese/Indian, some Indigenous	557	Locality of preschool (urban vs. rural)	Not applicable	Behavioural and emotional problems (SDQ)	No significant effects were found on children's total difficulty scores for locality of preschool (urban vs rural) (p > .05)
25	Quasi-experimental, pre-post test	Low	Abdul Rahman et al.	2023	English	English	Matching process, age 6 with low English proficiency.	6 years	Control group: 16 girls (53.3%); 14 boys (46.7%) Experimental group: 14 girls (46.7%); 16 boys (53.3%)	Not specified	60	- Intervention group received English instruction via Integrated Sound Word Method, incorporating early reading games - Control group received early reading instruction without game-based components	Delivered 30 minutes/day, 3 times/week, over 4 weeks (total: 6 hours)	Early reading proficiency in English	Integrated Sound Word Method with early reading games significantly improved early reading proficiency in the intervention group
26	Survey/Cross-sectional	Low	Sia et al.	2023	English	Not specified	Purposive sampling	21 to >30 years	74 female teachers (88.1%); 10 male teachers (11.9%)	71 - Chinese 7 - Indian 6 - Malay	84 (preschool operators)	Outdoor play structural factors	3 months	Socio-emotional; health and physical development; academic learning	- Functional needs significantly predicts development needs; - Development needs significantly predicts socio-emotional development; - Socio-emotional development significantly predicts health and physical development; - Academic learning significantly predicts socio-emotional development; - School readiness significantly predicts academic learning; - Cognitive development significantly predicts …
27	Cross-sectional - direct assessment	Low	Kong et al.	2024	English	English/BM	Statewide sampling	4 to 5 years (M=5.90 years, SD=0.58)	80 girls (47.1%); 90 boys (52.9%)	Not specified	170	Nature and duration of ECE participation	Not applicable	Cognitive development Language and literacy skills Socio-emotional development Motor development Health and hygiene knowledge Cultural understanding and learning approaches; International Development and Early Leaning Assessment battery (Pisani et al., 2018)	- Longer ECE participation significantly improved language and literacy skills (p = .016) - Longer duration was associated with poorer socio-emotional outcomes (p = .004)
28	Cross-sectional - direct assessment	Low	Kong et al.	2024	English	English	Purposive sampling	4-6 years	398 girls (37.9%); 412 boys (39.2%) Gender not reported for 241 children (22.9%)	Not specified	1051	Synchronous or hybrid learning Enrollment or non-enrollment	Not applicable	Emergent numeracy Emergent literacy Socio-emotional skills Motor skills; International Development and Early Leaning Assessment battery (Pisani et al., 2018)	- Synchronous (p = .033) and hybrid (p = .001) digital learning significantly increased likelihood of children being in the ‘mastering’ group - Lack of remote access (p = .004) and non-enrolment in ECE (p = .001) significantly reduced the likelihood of achieving mastering-level outcomes
